# Supplementary material
Source: PubMed Central journal article supplement (PMC8626569)
Supplement: mmc4.pdf [file mmc4.pdf]

*Disclaimer: This translation in Cyrillic and Traditional Mongolian were submitted by the authors and we reproduce it as supplied. It has not been peer reviewed. Our editorial processes have only been applied to the original abstract in English, which should serve as reference for this manuscript.*

## **Монгол улсын хүн амын дунд 2020 оны төгсгөл үед SARS-CoV-2 -ийн эсрэг эсрэгбиеийн тархалт: хүн амд суурилсан үндэсний судалгааны үр дүн**

### **Үндэслэл**

Дэлхий дахинд амьсгалын цочмог халтай хам шинж үүсгэгч титэм вирусийн 2-р хэв шинжийн (SARS-CoV-2)-ийн халдвар бүртгэгдэж эхэлсэн үетэй зэрэгцэн Монгол улс хариу арга хэмжээг 2020 оны эхнээс эрт авч хэрэгжүүлснээр 2020 оны 11 сар хүртэл дотоодын халдвар бүртгэгдээгүй. Бид хүн амын дунд SARS-CoV-2 -ийн эсрэг эсрэгбиеийн тархалтыг тодорхойлох үндэсний судалгааг дотоод халдвар бүртгэгдэх хүртэл хугацаанд судлан тодорхойллоо.

### **Аргачлал**

Судалгаанд 2020 оны 10-аас 12 дугаар сарын хооронд эрүүл мэндийн анхан шатны байгууллагаар дамжуулан хүн амыг насны бүлэгт суурилсан санамсаргүй түүвэрлэлтийн аргаар сонгон хамруулж, асуумж судалгаа болон ийлдэс цуглуулсан. Судалгаанд оролцогсдын ийлдэнд SARS-CoV-2-ийн эсрэг нийт эсрэгбиеийг тодорхойлж, эерэг тохиолдлыг SARS-CoV-2-ийн эсрэг IgG илрүүлэх хоёр шатлалт, тоон шинжилгээгээр баталгаажуулсан. Жинлэсэн болон шинжилгээнд төвшрүүлсэн эсрэгбиеийн тархалтыг тооцсон. Ийлдэс эерэг тохиолдолтой хамаарах хувьсуурыг тодорхойлоход хи-квадрат, Фишер эксакт сорил болон бусад шинжилгээг ашиглав.

### **Үр дүн**

Судалгаанд нийт 5000 оролцогч хамруулсан ба SARS-CoV-2-ийн эсрэг эсрэг бие (IgG) 72 тохиолдолд илэрсэн. Судалгааны хугацаанд Монгол улсад SARS-CoV-2 -ийн эсрэг эсрэгбиеийн тархалт 1.44% (95%CI, 1.21-1.67) байсан бол хүн амын дундах жинлэсэн тархалт 1.36% (95%CI, 1.11-1.63), шинжилгээнд төвшрүүлсэн тархалт 1.45% (95%CI, 1.11-1.63) байлаа. Хүн амын нас, хүйс, газарзүйн байршил, ажил мэргэжлийн хүчин зүйлс болон ийлдэс тархварзүйн хооронд холбоо ажиглагдаагүй ( $p > 0.05$ ). Мөн ийлдэс судлалын шинжилгээний үр дүн ба өмнөх 3 сарын хугацаанд илэрсэн шинж тэмдэг, эмнэлзүйн хамшинжийн хооронд хамаарал ажиглагдаагүй ( $p > 0.05$ ).

### **Хэлцэмж**

Хилийн хязгаарлалт тогтоох, сургалтын байгууллагуудыг хаах, амны хаалт зүүх зэрэг нийгмийн эрүүл мэндийн хариу арга хэмжээг эрт хэрэгжүүлсэнтэй холбоотойгоор цартахлын эхний жилд Монгол улсад улсад SARS-CoV-2-ийн эсрэгбиеийн тархалт бага түвшинд байжээ. Бидний судалгаагаар Монгол улсад 2020 оны 11 сар хүртэл хүн амын дунд халдвар томоохон хэмжээгээр тархаагүй байна. Цар тахлын вирусийн эсрэг 2021, 2022 оны вакцинжуулалтын хөтөлбөрийн дараах дархлал тогтоц болон дотоодын халдварын хөдлөлзүйг нарийвчлан тогтоохын тулд ийлдэс судлалын цуврал судалгаа хийх шаардлагатай.

### **Санхүүжилт**

Дэлхийн эрүүл мэндийн байгууллага (ДЭМБ), ХБНГУ-ын Эрүүл мэндийн яам (BMG)-ны КОВИД-19-ын судалгаа хөгжил болон КОВИД-19 Нэгдмэл хариу арга хэмжээний сангийн санхүүжилттэй ДЭМБ-ын ЮНИТИ судалгааны санаачлага

### **Түлхүүр үгс:**

SARS-CoV-2, КОВИД-19, цар тахал, ийлдэс тархварзүйн судалгаа, Монгол улс, ийлдэс тархварзүй, дархлал тогтоц
